# Supplementary material for: Efficient tandem polymer light-emitting diodes with PTPA-P/ZnO as the charge generation layer
Source: Royal Society of Chemistry journal article supplement (doi:10.1039/c9tc01448a), 2019-01-01
Supplement: c9tc01448a1.pdf [file c9tc01448a1.pdf]

## Supporting Information

### **Efficient tandem polymer light-emitting diodes used PTPA-P/ZnO as charge generation layer**

Jin Xu,<sup>ab</sup> Feng Peng,<sup>a</sup> Zhicheng Hu,<sup>a</sup> Lei Yu,<sup>\*ac</sup> Fei Huang,<sup>a</sup> Wei Yang,<sup>\*a</sup> and Yong Cao<sup>a</sup>

\*Corresponding Author - Email: [pswyang@scut.edu.cn](mailto:pswyang@scut.edu.cn)

<sup>a</sup> State Key Laboratory of Luminescent Materials and Devices, South China University of Technology, Guangzhou 510640, P. R. China

<sup>b</sup> School of Mechanical Engineering, Dongguan University of Technology, Dongguan 523808, P. R. China

<sup>c</sup> Guangdong Juhua Printed Display Technology Co., Ltd. Guangzhou 510700, P. R. China

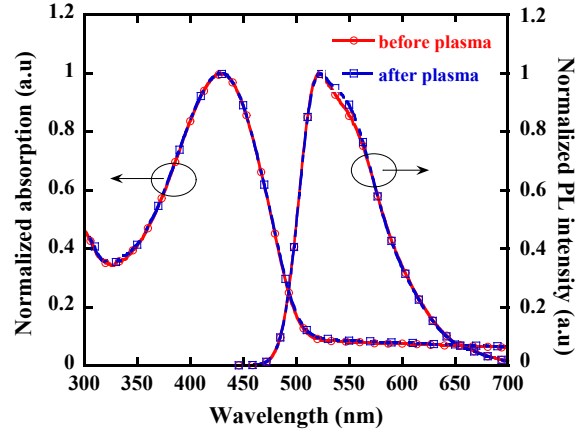

**Fig.S1** UV-vis absorption and PL spectra of P-PPV in film before and after oxygen plasma treatment.

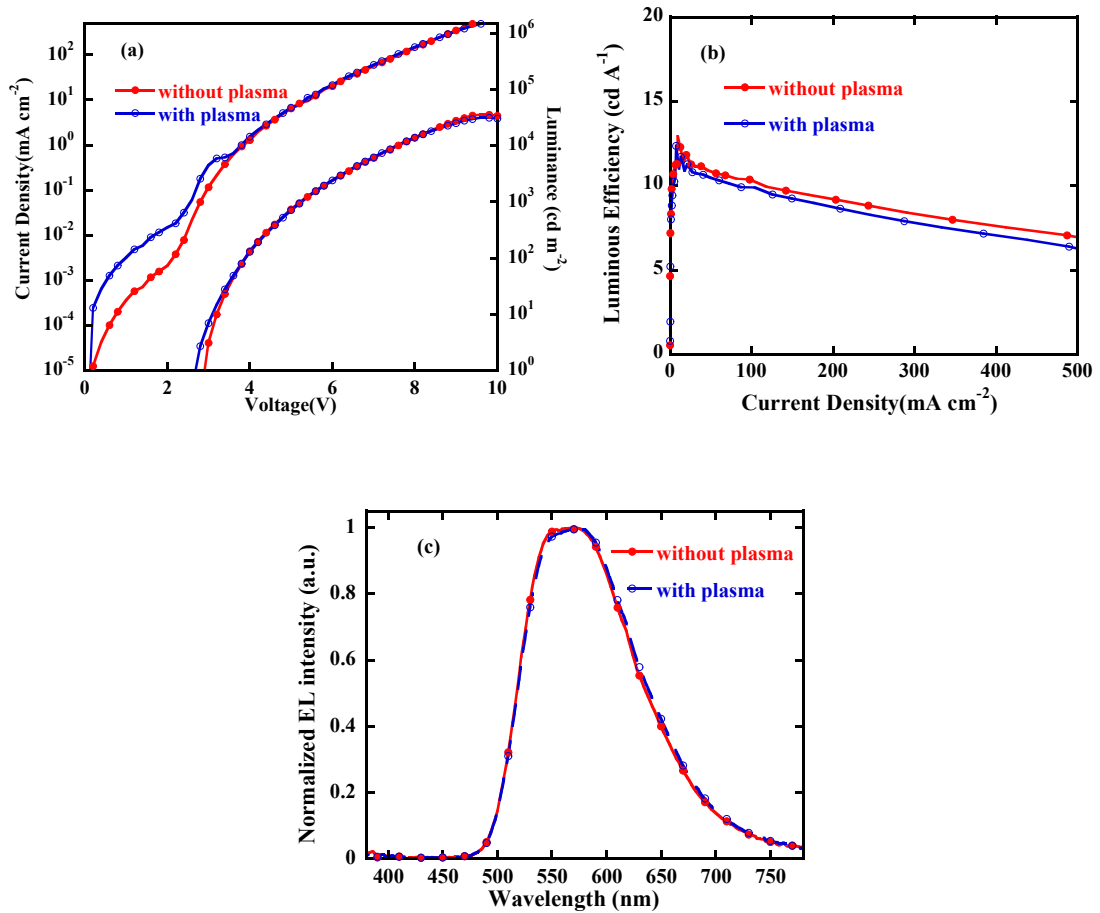

**Fig. S2** J-V-L(a), LE-J(b) and EL spectra of the P-PPV layer with/ without oxygen plasma treatment. Device structure: ITO/ZnO/PEIE/P-PPV/MoO<sub>3</sub>/Al.

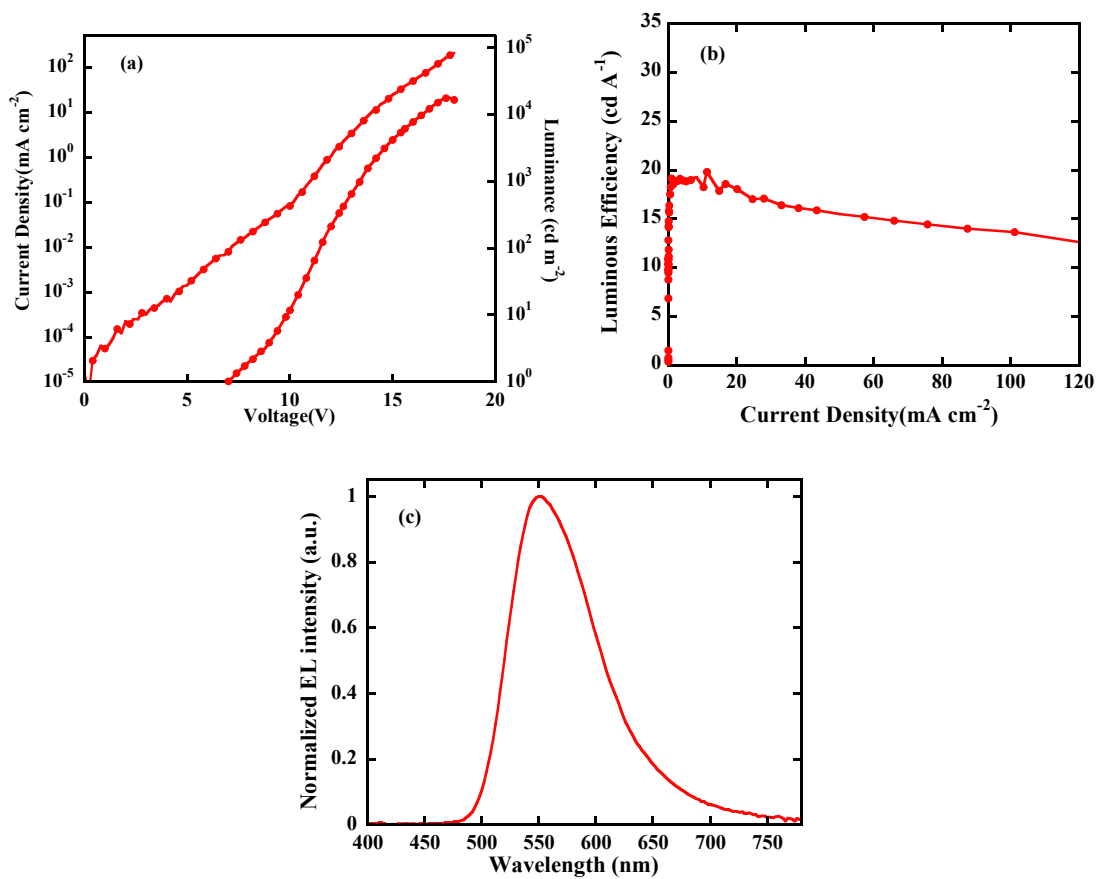

**Fig. S3** J-V-L(a), LE-J(b) and EL spectrum(c) of the tandem device used PEIE as the electron injecting layer. Device structure: ITO/ZnO/PEIE/P-PPV/PEDOT:PSS/ZnO/PEIE/P-PPV/MoO<sub>3</sub>/Al.
